# Supplementary material
Source: HighWire-hosted journal article supplement (https://www.rcpjournals.org/highwire/filestream/12055/field_highwire_adjunct_files/1/Arivanathan_supplementary_material_S2.pdf)
Supplement: Arivanathan_supplementary_material_S2.pdf [file Arivanathan_supplementary_material_S2.pdf]

## Supplementary material S2

Demographics and clinical characteristics of Nottingham and Ottawa patients included in the study

|                                  | All (n=335)<br>median (IQR) or<br>number (%) | Nottingham (n=132)<br>median (IQR) or<br>number (%) | Ottawa (n=203)<br>median (IQR) or<br>number (%) | p value           |
|----------------------------------|----------------------------------------------|-----------------------------------------------------|-------------------------------------------------|-------------------|
| <b>Age at LT (years)</b>         | 55 (46 – 61)                                 | 54 (39 – 59)                                        | 56 (49 – 62)                                    | <b>0.007</b>      |
| <b>Female sex</b>                | 118 (35.2%)                                  | 51 (38.6%)                                          | 67 (33.0%)                                      | 0.29              |
| <b>Pre-LT</b>                    |                                              |                                                     |                                                 |                   |
| DM                               | 69 (20.6%)                                   | 27 (20.5%)                                          | 42 (20.7%)                                      | 0.96              |
| Hypertension                     | 70 (20.9%)                                   | 26 (19.7%)                                          | 44 (21.7%)                                      | 0.66              |
| Dyslipidaemia                    | 29 (8.7%)                                    | 12 (9.1%)                                           | 17 (8.4%)                                       | 0.82              |
| CVD                              | 12 (3.6%)                                    | 3 (2.3%)                                            | 9 (4.4%)                                        | 0.30              |
| Malignancy†                      | 22 (6.6%)                                    | 3 (2.3%)                                            | 7 (3.4%)                                        | 0.54              |
| <b>History of Pre-LT Smoking</b> | 131 (39.1%)                                  | 38 (28.8%)                                          | 93 (45.8%)                                      | <b>0.002</b>      |
| <b>Aetiology</b>                 |                                              |                                                     |                                                 |                   |
| ALD                              | 56 (16.7%)                                   | 25 (18.9%)                                          | 31 (15.3%)                                      | <b>&lt;0.0001</b> |
| NAFLD                            | 29 (8.7%)                                    | 9 (6.8%)                                            | 20 (9.9%)                                       |                   |
| HCV                              | 84 (25.1%)                                   | 13 (9.8%)                                           | 71 (35.0%)                                      |                   |
| HBV                              | 16 (4.8%)                                    | 4 (3.0%)                                            | 12 (5.9%)                                       |                   |
| AIH                              | 15 (4.5%)                                    | 5 (3.8%)                                            | 10 (4.9%)                                       |                   |
| PBC                              | 31 (9.3%)                                    | 18 (13.6%)                                          | 13 (6.4%)                                       |                   |
| PSC                              | 33 (9.9%)                                    | 17 (12.9%)                                          | 16 (7.9%)                                       |                   |
| Others                           | 71 (21.2%)                                   | 41 (31.1%)                                          | 30 (14.8%)                                      |                   |
| <b>Indication</b>                |                                              |                                                     |                                                 |                   |
| ALF                              | 44 (13.1%)                                   | 32 (24.2%)                                          | 12 (5.9%)                                       | <b>&lt;0.0001</b> |
| Decompensation                   | 217 (64.8%)                                  | 90 (68.2%)                                          | 127 (62.6%)                                     |                   |
| HCC                              | 64 (19.1%)                                   | 8 (6.1%)                                            | 56 (27.6%)                                      |                   |
| Other                            | 10 (3.0%)                                    | 2 (1.5%)                                            | 8 (3.9%)                                        |                   |
| <b>LT Decade</b>                 |                                              |                                                     |                                                 |                   |
| 1987 – 1996                      | 22 (6.6%)                                    | 12 (9.1%)                                           | 10 (4.9%)                                       | <b>0.007</b>      |
| 1997 – 2006                      | 92 (27.5%)                                   | 46 (34.8%)                                          | 46 (22.7%)                                      |                   |
| 2007 – 2016                      | 221 (66.6%)                                  | 74 (56.1%)                                          | 147 (72.4%)                                     |                   |
| <b>Peri-LT RRT</b>               | 9 (2.7%)                                     | 0 (0.0%)                                            | 9 (4.4%)                                        | na                |
| <b>Donor type</b>                |                                              |                                                     |                                                 |                   |
| DBD                              | 274 (81.8%)                                  | 117 (88.6%)                                         | 157 (77.3%)                                     | <b>&lt;0.0001</b> |
| DCD                              | 16 (4.8%)                                    | 14 (10.6%)                                          | 2 (1.0%)                                        |                   |
| LD                               | 45 (13.4%)                                   | 1 (0.8%)                                            | 44 (21.7%)                                      |                   |

**p<0.05 indicated in bold.** †History of non-hepatocellular carcinoma malignancies prior to transplantation.

AIH = autoimmune hepatitis; ALD = alcohol-related liver disease; ALF = acute liver failure; CVD = cardiovascular disease; DBD = donation after brainstem death; DCD = donation after circulatory death; DM = diabetes mellitus; HBV = hepatitis B; HCC = hepatocellular carcinoma; HCV = hepatitis C; LD = living donor; LT = liver transplantation; NAFLD = non-alcoholic fatty liver disease; PBC = primary biliary cholangitis; PSC = primary sclerosing cholangitis.
